# Supplementary material
Source: ML conference proceedings conference paper supplement (https://openreview.net/forum?id=b9APFSTylGT)
Supplement: supplementary_material [file attachment]

---

# Prompt Learning with Optimal Transport for Vision-Language Models

## Supplementary Material

---

Anonymous Author(s)

Affiliation

Address

email

### 1 A. More Details of Optimal Transport

2 The Optimal Transport [11] is initially introduced to find a transportation plan to move simultaneously  
3 several items at a minimal cost, such as moving a pile of sand to fill all the holes. Recently, it is widely  
4 used for the comparison of distributions. Mathematically, given two probability density function  $U$   
5 and  $V$  over space  $\mathcal{X}$  and  $\mathcal{Y}$ , the OT (Wasserstein) distance [16] can be defined as

$$D_{OT}(U, V) = \inf_{\Gamma} \int_{\mathcal{X} \times \mathcal{Y}} C(\mathbf{x}, \mathbf{y}) d\gamma(\mathbf{x}, \mathbf{y}), \quad (1)$$

6 where  $C(\mathbf{x}, \mathbf{y})$  is the cost between two points in the space  $\mathcal{X} \times \mathcal{Y}$ , and  $\Gamma$  denotes the set of transport  
7 plans between support points  $\mathbf{x}$  and  $\mathbf{y}$  (e.g.  $\gamma(\mathbf{x}, \mathbf{y})$ ). We can regard two probability density functions  
8  $U$  and  $V$  as piles and holes and  $C$  is the cost function of moving a unit of sand.

9 In our problem of multiple prompts learning, we formulate the sets of visual features and prompt  
10 features as two discrete distributions as

$$U = \sum_{m=1}^M u_m \delta_{\mathbf{f}_m} \quad \text{and} \quad V = \sum_{n=1}^N v_n \delta_{\mathbf{g}_n}, \quad (2)$$

11 where  $\mathbf{u}$  and  $\mathbf{v}$  are the discrete probability vectors that sum to 1, and  $\delta_{\mathbf{f}}$  is a Dirac delta function  
12 placed at support point  $\mathbf{f}$  in the embedding space. Given two support points  $\mathbf{f}_m$  and  $\mathbf{g}_n$ , the cost  
13 function is written as  $C(\mathbf{f}_m, \mathbf{g}_n) = 1 - \text{sim}(\mathbf{f}_m, \mathbf{g}_n) = 1 - \frac{\mathbf{f}_m^T \mathbf{g}_n}{\|\mathbf{f}_m\| \|\mathbf{g}_n\|}$ . For simply, in this discrete  
14 situation,  $C \in \mathbb{R}^{M \times N}$  is a cost matrix in which each point denotes the cost between  $\mathbf{f}_m$  and  $\mathbf{g}_n$ .  
15 Then, the total distance of these two distributions is written as:

$$\langle \mathbf{T}, \mathbf{C} \rangle = \sum_{m=1}^M \sum_{n=1}^N T_{m,n} C_{m,n}, \quad (3)$$

16 where the  $\mathbf{T} \in \mathbb{R}^{M \times N}$  is a matrix of transport plan, which is learned to minimize the total distance.  
17 Each point  $T_{m,n}$  in  $\mathbf{T}$  is a weight of local cost  $C_{m,n}$ .

18 The optimization problem of optimal transport is formulated as:

$$\begin{aligned} d_{OT}(\mathbf{u}, \mathbf{v} | \mathbf{C}) &= \min_{\mathbf{T}} \langle \mathbf{T}, \mathbf{C} \rangle \\ \text{subject to} \quad & \mathbf{T} \mathbf{1} = \mathbf{u}, \mathbf{T}^T \mathbf{1} = \mathbf{v}, \mathbf{T} \geq 0. \end{aligned} \quad (4)$$

19 These constraints of  $\mathbf{T}$  is used to match its marginal distributions and original discrete distributions  
20 in Eq (2). In our framework, we treat visual features  $\mathbf{f}_m$  and prompt features  $\mathbf{g}_n$  equally and thus  
21  $\mathbf{u} = \mathbf{1}_{M \times 1} / M$  and  $\mathbf{v} = \mathbf{1}_{N \times 1} / N$ .

---

**Algorithm 1:** Prompt Learning with Optimal Transport

---

**Input:** Training few-shot image data:  $\mathbf{X} = \{\mathbf{x}\}$ , pretrained CLIP model  $f$  and  $g$ . number of prompts  $N$ , entropy parameter  $\lambda$ , maximum number of iterations in inner and outer loops  $T_{in}, T_{out}$ .

**Output:** The parameters of prompts  $\{\mathbf{vec}_{l,n}\}_{l=1,n=1}^{L,N}$

```
1: Initialize  $\{\mathbf{vec}_{l,n}\}$ 
2: for  $t_{out} = 1, 2, \dots, T_{out}$  in the outer loop do
3:   Obtain a visual feature set  $\mathbf{F} \in \mathbb{R}^{M \times C}$  with the visual encoder of CLIP;
4:   Generate prompt feature set  $\mathbf{G}_k \in \mathbb{R}^{N \times C}$  of each class with the textual encoder;
5:   Calculate the cost matrix  $\mathbf{C}_k = \mathbf{1} - \mathbf{F}^T \mathbf{G}_k \in \mathbb{R}^{M \times N}$  of each class
6:   Calculate the OT distance with an inner loop: Initialize the  $\mathbf{v}^0 = \mathbf{1}$ ,  $\delta = 0.01$  and  $\Delta_v = \infty$ 
7:   for  $t_{in} = 1, 2, \dots, T_{in}$  do
8:     Update  $\mathbf{u}^{t_{in}} = \mathbf{u} / ((\exp(-\mathbf{C}/\lambda) \mathbf{v}^{t_{in}-1})$ 
9:     Update  $\mathbf{v}^{t_{in}} = \mathbf{v} / ((\exp(-\mathbf{C}/\lambda)^T \mathbf{u}^{t_{in}})$ 
10:    Update  $\Delta_v = \sum |\mathbf{v}^{t_{in}} - \mathbf{v}^{t_{in}-1}| / N$ 
11:    if  $\Delta_v < \delta$  then
12:      break
13:    end if
14:  end for
15:  Obtain optimal transport plan as  $\mathbf{T}_k^* = \text{diag}(\mathbf{u}^t) \exp(-\mathbf{C}_k/\lambda) \text{diag}(\mathbf{v}^t)$ ,
16:  Calculate the OT distance  $d_{OT}(k) = \langle \mathbf{T}_k^*, \mathbf{C}_k \rangle$ 
17:  Calculate the classification probability  $p_{ot}(y = k | \mathbf{x})$  with the OT distance
18:  Update the parameters of prompts with cross-entropy loss  $L_{CE}$ 
19: end for
20: return  $\{\mathbf{vec}_{l,n}\}_{l=1,n=1}^{L,N}$ 
```

---

22 As directly optimizing the above objective is always time-consuming, we apply the Sinkhorn dis-  
23 tance [3] to use an entropic constraint for fast optimization. The optimization problem with a  
24 Lagrange multiplier of the entropy constraint is:

$$\begin{aligned} d_{OT,\lambda}(\mathbf{u}, \mathbf{v} | \mathbf{C}) &= \underset{\mathbf{T}}{\text{minimize}} \langle \mathbf{T}, \mathbf{C} \rangle - \lambda h(\mathbf{T}) \\ \text{subject to} \quad & \mathbf{T} \mathbf{1} = \mathbf{u}, \mathbf{T}^T \mathbf{1} = \mathbf{v}, \end{aligned} \quad (5)$$

25 where  $h(\cdot)$  is entropy and  $\lambda \geq 0$  is a hyper-parameter. Then we can have a fast optimization solution  
26 with a few iterations as:

$$\mathbf{T}^* = \text{diag}(\mathbf{u}^t) \exp(-\mathbf{C}/\lambda) \text{diag}(\mathbf{v}^t), \quad (6)$$

27 where  $t$  denotes iteration and in each iteration  $\mathbf{u}^t = \mathbf{u} / ((\exp(-\mathbf{C}/\lambda) \mathbf{v}^{t-1})$  and  $\mathbf{v}^t =$   
28  $\mathbf{v} / ((\exp(-\mathbf{C}/\lambda)^T \mathbf{u}^t)$ , with the initiation  $\mathbf{v}^0 = \mathbf{1}$ . The detailed algorithm is shown in Algorithm 1

## 29 B. Dataset Details

30 The datasets we used in the experiments follow CoOp [19], which include 11 datasets for few-shot  
31 visual recognition and 4 ImageNet-based datasets for generalization (robustness) evaluation. The  
32 details of each dataset are shown in Table 1, including the number of classes, the sizes of training and  
33 testing sets, and original tasks.

## 34 C. Few-shot Recognition Accuracy

35 In Section 4.3.1, we provide a line chart to show and compare the performance of PLOT and CoOp.  
36 In this section, we provide detailed performance results on all 11 few-shot recognition datasets in  
37 Table 2, where we use gray for our method and white for CoOp. To highlight, we respectively use  
38 dark cyan and light cyan to represent the performance of PLOT and CoOp on the average of all 11  
39 datasets. We repeat all experiments 3 times and report the mean and standard deviation in the table.

Table 1: The detailed statistics of datasets used in experiments.

| Dataset              | Classes | Training size | Testing size | Task                              |
|----------------------|---------|---------------|--------------|-----------------------------------|
| Caltech101 [5]       | 100     | 4,128         | 2,465        | Object recognition                |
| DTD [2]              | 47      | 2,820         | 1,692        | Texture recognition               |
| EuroSAT [6]          | 10      | 13,500        | 8,100        | Satellite image recognition       |
| FGVCAircraft [10]    | 100     | 3,334         | 3,333        | Fine-grained aircraft recognition |
| Flowers102 [12]      | 102     | 4,093         | 2,463        | Fine-grained flowers recognition  |
| Food101 [1]          | 101     | 50,500        | 30,300       | Fine-grained food recognition     |
| ImageNet [4]         | 1,000   | 1.28M         | 50,000       | Object recognition                |
| OxfordPets [13]      | 37      | 2,944         | 3,669        | Fine-grained pets recognition     |
| StanfordCars [9]     | 196     | 6,509         | 8,041        | Fine-grained car recognition      |
| SUN397 [18]          | 397     | 15,880        | 19,850       | Scene recognition                 |
| UCF101 [15]          | 101     | 7,639         | 3,783        | Action recognition                |
| ImageNetV2 [14]      | 1,000   | -             | 10,000       | Robustness of collocation         |
| ImageNet-Sketch [17] | 1000    | -             | 50,889       | Robustness of sketch domain       |
| ImageNet-A [8]       | 200     | -             | 7,500        | Robustness of adversarial attack  |
| ImageNet-R [7]       | 200     | -             | 30,000       | Robustness of multi-domains       |

Table 2: The few-shot visual recognition accuracy on 11 datasets.

| Dataset      | Methods | 1 shot           | 2 shots          | 4 shots          | 8 shots          | 16 shots         |
|--------------|---------|------------------|------------------|------------------|------------------|------------------|
| Caltech101   | PLOT    | 89.83 $\pm$ 0.33 | 90.67 $\pm$ 0.21 | 90.80 $\pm$ 0.20 | 91.54 $\pm$ 0.33 | 92.24 $\pm$ 0.38 |
|              | CoOp    | 87.51 $\pm$ 1.02 | 87.84 $\pm$ 1.10 | 89.52 $\pm$ 0.80 | 90.28 $\pm$ 0.42 | 91.99 $\pm$ 0.31 |
| DTD          | PLOT    | 46.55 $\pm$ 2.62 | 51.24 $\pm$ 1.95 | 56.03 $\pm$ 0.43 | 61.70 $\pm$ 0.35 | 65.60 $\pm$ 0.82 |
|              | CoOp    | 43.62 $\pm$ 1.96 | 45.35 $\pm$ 0.31 | 53.94 $\pm$ 1.37 | 59.69 $\pm$ 0.13 | 62.51 $\pm$ 0.25 |
| EuroSAT      | PLOT    | 54.05 $\pm$ 5.95 | 64.21 $\pm$ 1.90 | 72.36 $\pm$ 2.29 | 78.15 $\pm$ 2.65 | 82.23 $\pm$ 0.91 |
|              | CoOp    | 52.12 $\pm$ 5.46 | 59.00 $\pm$ 3.48 | 68.61 $\pm$ 3.54 | 77.08 $\pm$ 2.42 | 83.69 $\pm$ 0.47 |
| FGVCAircraft | PLOT    | 17.90 $\pm$ 0.09 | 18.94 $\pm$ 0.44 | 22.36 $\pm$ 0.42 | 26.17 $\pm$ 0.29 | 31.49 $\pm$ 0.89 |
|              | CoOp    | 8.59 $\pm$ 5.79  | 16.52 $\pm$ 2.38 | 20.63 $\pm$ 2.46 | 26.63 $\pm$ 0.86 | 31.43 $\pm$ 0.96 |
| Flowers102   | PLOT    | 71.72 $\pm$ 0.97 | 81.19 $\pm$ 0.79 | 87.82 $\pm$ 0.20 | 92.43 $\pm$ 0.25 | 94.76 $\pm$ 0.34 |
|              | CoOp    | 67.98 $\pm$ 1.98 | 77.58 $\pm$ 1.46 | 86.10 $\pm$ 1.05 | 91.27 $\pm$ 0.83 | 94.49 $\pm$ 0.40 |
| FOOD101      | PLOT    | 77.74 $\pm$ 0.47 | 77.70 $\pm$ 0.02 | 77.21 $\pm$ 0.43 | 75.31 $\pm$ 0.30 | 77.09 $\pm$ 0.18 |
|              | CoOp    | 74.25 $\pm$ 1.52 | 72.61 $\pm$ 1.33 | 73.49 $\pm$ 2.03 | 71.58 $\pm$ 0.79 | 74.48 $\pm$ 0.15 |
| ImageNet     | PLOT    | 59.54 $\pm$ 0.16 | 60.64 $\pm$ 0.06 | 61.49 $\pm$ 0.23 | 61.92 $\pm$ 0.09 | 63.01 $\pm$ 0.13 |
|              | CoOp    | 56.99 $\pm$ 1.03 | 56.40 $\pm$ 0.87 | 58.48 $\pm$ 0.47 | 60.39 $\pm$ 0.57 | 61.91 $\pm$ 0.17 |
| OxfordPets   | PLOT    | 87.49 $\pm$ 0.57 | 86.64 $\pm$ 0.63 | 88.63 $\pm$ 0.26 | 87.39 $\pm$ 0.74 | 87.21 $\pm$ 0.40 |
|              | CoOp    | 85.99 $\pm$ 0.28 | 82.22 $\pm$ 2.15 | 86.65 $\pm$ 0.97 | 85.36 $\pm$ 1.00 | 87.02 $\pm$ 0.89 |
| StanfordCars | PLOT    | 56.60 $\pm$ 0.36 | 57.52 $\pm$ 0.71 | 63.41 $\pm$ 0.29 | 67.03 $\pm$ 0.50 | 72.80 $\pm$ 0.75 |
|              | CoOp    | 55.81 $\pm$ 1.67 | 58.41 $\pm$ 0.43 | 62.74 $\pm$ 0.16 | 67.64 $\pm$ 0.06 | 73.60 $\pm$ 0.19 |
| SUN397       | PLOT    | 62.47 $\pm$ 0.43 | 61.71 $\pm$ 0.65 | 65.09 $\pm$ 0.43 | 67.48 $\pm$ 0.04 | 69.96 $\pm$ 0.24 |
|              | CoOp    | 60.12 $\pm$ 0.82 | 59.60 $\pm$ 0.76 | 63.24 $\pm$ 0.63 | 65.77 $\pm$ 0.02 | 68.36 $\pm$ 0.66 |
| UCF101       | PLOT    | 64.53 $\pm$ 0.70 | 66.83 $\pm$ 0.43 | 69.60 $\pm$ 0.67 | 74.45 $\pm$ 0.50 | 77.26 $\pm$ 0.64 |
|              | CoOp    | 62.13 $\pm$ 1.14 | 64.05 $\pm$ 0.99 | 67.79 $\pm$ 0.71 | 72.71 $\pm$ 0.50 | 76.90 $\pm$ 0.50 |
| Average      | PLOT    | 62.59 $\pm$ 1.13 | 65.23 $\pm$ 0.72 | 68.60 $\pm$ 0.52 | 71.23 $\pm$ 0.51 | 73.94 $\pm$ 0.54 |
|              | CoOp    | 59.56 $\pm$ 2.06 | 61.78 $\pm$ 1.39 | 66.47 $\pm$ 1.29 | 69.85 $\pm$ 0.69 | 73.33 $\pm$ 0.42 |

## 40 D. Computation Cost Evaluation

41 As shown in Table 3, we provide the comparison of the training time and inference seed of the  
42 baseline method CoOp [19] and our PLOT with the different number of prompts. We report the  
43 one-epoch time training on the 1-shot setting of the Food101 [1] dataset and the number of images  
44 processed by the model in 1 second. Taking  $N = 4$  as an example, PLOT only reduces the 9.2%

Table 3: The training and inference time comparison.

| Settings                  | CoOp  | PLOT(N=1) | PLOT(N=2) | PLOT(N=4) | PLOT(N=8) |
|---------------------------|-------|-----------|-----------|-----------|-----------|
| Training Time (s)         | 1.127 | 1.135     | 1.148     | 1.182     | 1.267     |
| Inference Time (images/s) | 719.1 | 714.4     | 690.7     | 653.0     | 519.8     |

Table 4: The nearest words for 16 context vectors of all  $N = 4$  prompts learned by PLOT. N/A means non-Latin characters.

| Number | Prompt 1      | Prompt 2 | Prompt 3 | Prompt 4     |
|--------|---------------|----------|----------|--------------|
| 1      | ag            | pa       | trying   | gaz          |
| 2      | flint         | as       | field    | <b>white</b> |
| 3      | leaving       | wit      | N/A      | t            |
| 4      | sot           | l        | icons    | ario         |
| 5      | tint          | N/A      | eclub    | safe         |
| 6      | tar           | yl       | indiffe  | class        |
| 7      | attn          | N/A      | ts       | represented  |
| 8      | 2             | job      | cold     | attend       |
| 9      | rollingstones | built    | yeah     | vie          |
| 10     | N/A           | brought  | band     | recognized   |
| 11     | N/A           | or       | love     | old          |
| 12     | bel           | j        | late     | stel         |
| 13     | <b>head</b>   | ag       | industry | awhile       |
| 14     | artifact      | bad      | N/A      | ded          |
| 15     | an            | chie     | across   | these        |
| 16     | 5             | in       | actual   | visiting     |

inference speed and requires an extra 4.9% training time, which is acceptable given the performance improvement.

## E. The Interpretation of the Learned Prompts

The learned prompts are difficult to be understood by humans since the parameters are optimized in the continuous space [19]. CoOp proposes to use the word which is nearest to learned prompts in the embedding space to visualize the prompts. Following this manner, we show the nearest words of our learned prompts in Table 4. Similar to CoOp, most words can not be directly understood by human logic. However, we still find the relations between the learned prompts and the corresponding optimal transport plan. As shown in Figure 4 in the main paper, we can observe that the optimal transport plan for Prompt 1 always focuses on the “head”, such as the head of “brambling”, the head of “rooster”, and even the head of “aircraft carrier”. It is because the word “head” is in Prompt 1. Similarly, we can find that Prompt 4 prefers the white part of images, such as the white environment in the image of “brambling” and the snow in the image of “dog sled”. It demonstrates that the learned multiple prompts focus on different characteristics of categories.

## F. Visualization of the Failure Cases

*To better understand the method and further discover the reason of the failure cases, we visualize the attention maps of some failure cases. As shown in Figure 1, we showed two failure examples with class "2000 AM General Hummer" in the StanfordCars dataset. During the training, we set the number of prompts as 4, but in these visualization results, we found that some of learned prompts remarkably coincide with each other. These prompts can be roughly divided into two classes: Foreground and Background. For example, in both images, prompt 2 (right top) and 3 (left down) focus on the foreground car, while the others focus on the background. It demonstrates that not all classes have multiple complementary attributes, which motivates us to go further to learn the dynamic local prompts numbers to reduce the computational load in the future.*

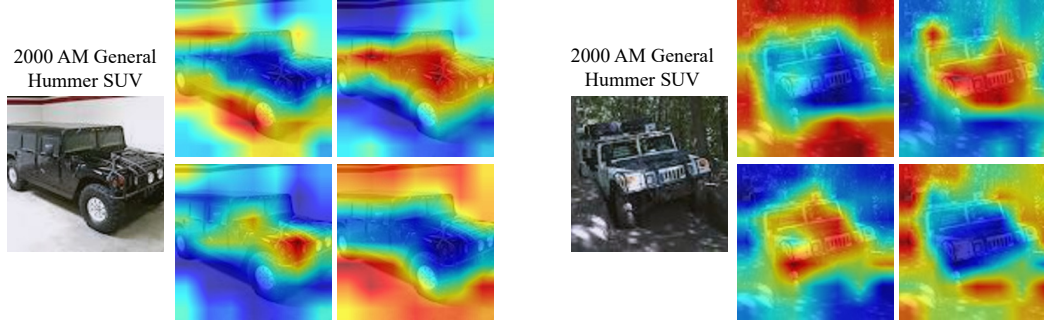

Figure 1: *Failure Visualization. We provide the heatmaps of transport plan  $T$  related to each prompt on 2 failure examples in the StanfordCars dataset.*

## 69 G. Code

70 The code used in our experiments is provided in the supplementary material. We implement the  
71 method with Pytorch 1.7. Our implementation is based on the publicly released code of CoOp [19].

## 72 References

- 73 [1] Lukas Bossard, Matthieu Guillaumin, and Luc Van Gool. Food-101—mining discriminative components  
74 with random forests. In *ECCV*, pages 446–461, 2014.
- 75 [2] Mircea Cimpoi, Subhransu Maji, Iasonas Kokkinos, Sammy Mohamed, and Andrea Vedaldi. Describing  
76 textures in the wild. In *CVPR*, pages 3606–3613, 2014.
- 77 [3] Marco Cuturi. Sinkhorn distances: lightspeed computation of optimal transport. In *NeurIPS*, volume 2,  
78 page 4, 2013.
- 79 [4] Jia Deng, Wei Dong, Richard Socher, Li-Jia Li, Kai Li, and Li Fei-Fei. Imagenet: A large-scale hierarchical  
80 image database. In *CVPR*, pages 248–255, 2009.
- 81 [5] Li Fei-Fei, Rob Fergus, and Pietro Perona. Learning generative visual models from few training examples:  
82 An incremental bayesian approach tested on 101 object categories. In *CVPRW*, pages 178–178, 2004.
- 83 [6] Patrick Helber, Benjamin Bischke, Andreas Dengel, and Damian Borth. Eurosat: A novel dataset and deep  
84 learning benchmark for land use and land cover classification. *IEEE Journal of Selected Topics in Applied*  
85 *Earth Observations and Remote Sensing*, 12(7):2217–2226, 2019.
- 86 [7] Dan Hendrycks, Steven Basart, Norman Mu, Saurav Kadavath, Frank Wang, Evan Dorundo, Rahul Desai,  
87 Tyler Zhu, Samyak Parajuli, Mike Guo, et al. The many faces of robustness: A critical analysis of  
88 out-of-distribution generalization. *arXiv preprint arXiv:2006.16241*, 2020.
- 89 [8] Dan Hendrycks, Kevin Zhao, Steven Basart, Jacob Steinhardt, and Dawn Song. Natural adversarial  
90 examples. *arXiv preprint arXiv:1907.07174*, 2019.
- 91 [9] Jonathan Krause, Michael Stark, Jia Deng, and Li Fei-Fei. 3d object representations for fine-grained  
92 categorization. In *ICCVW*, pages 554–561, 2013.
- 93 [10] Subhransu Maji, Esa Rahtu, Juho Kannala, Matthew Blaschko, and Andrea Vedaldi. Fine-grained visual  
94 classification of aircraft. *arXiv preprint arXiv:1306.5151*, 2013.
- 95 [11] Gaspard Monge. Mémoire sur la théorie des déblais et des remblais. *Histoire de l’Académie Royale des*  
96 *Sciences de Paris*, 1781.
- 97 [12] Maria-Elena Nilsback and Andrew Zisserman. Automated flower classification over a large number of  
98 classes. In *2008 Sixth Indian Conference on Computer Vision, Graphics & Image Processing*, pages  
99 722–729, 2008.
- 100 [13] Omkar M Parkhi, Andrea Vedaldi, Andrew Zisserman, and CV Jawahar. Cats and dogs. In *CVPR*, pages  
101 3498–3505, 2012.
- 102 [14] Benjamin Recht, Rebecca Roelofs, Ludwig Schmidt, and Vaishal Shankar. Do imagenet classifiers  
103 generalize to imagenet? *arXiv preprint arXiv:1902.10811*, 2019.
- 104 [15] Khurram Soomro, Amir Roshan Zamir, and Mubarak Shah. Ucf101: A dataset of 101 human actions  
105 classes from videos in the wild. *arXiv preprint arXiv:1212.0402*, 2012.
- 106 [16] Matthew Thorpe. Introduction to optimal transport. *Lecture Notes*, 2019.

- 107 [17] Haohan Wang, Songwei Ge, Zachary Lipton, and Eric P Xing. Learning robust global representations by  
108 penalizing local predictive power. *NeurIPS*, 32, 2019.
- 109 [18] Jianxiong Xiao, James Hays, Krista A Ehinger, Aude Oliva, and Antonio Torralba. Sun database: Large-  
110 scale scene recognition from abbey to zoo. In *CVPR*, pages 3485–3492, 2010.
- 111 [19] Kaiyang Zhou, Jingkang Yang, Chen Change Loy, and Ziwei Liu. Learning to prompt for vision-language  
112 models. *arXiv preprint arXiv:2109.01134*, 2021.
